# Supplementary material for: LncRNA BANCR promotes tumorigenesis and enhances adriamycin resistance in colorectal cancer
Source: publisher site journal article supplement (doi:10.18632/aging.101530), 2018-08-22
Supplement: Supplementary file [file aging-v10i8-101530-supplementary-material-SD1.pdf]

## SUPPLEMENTARY FIGURE

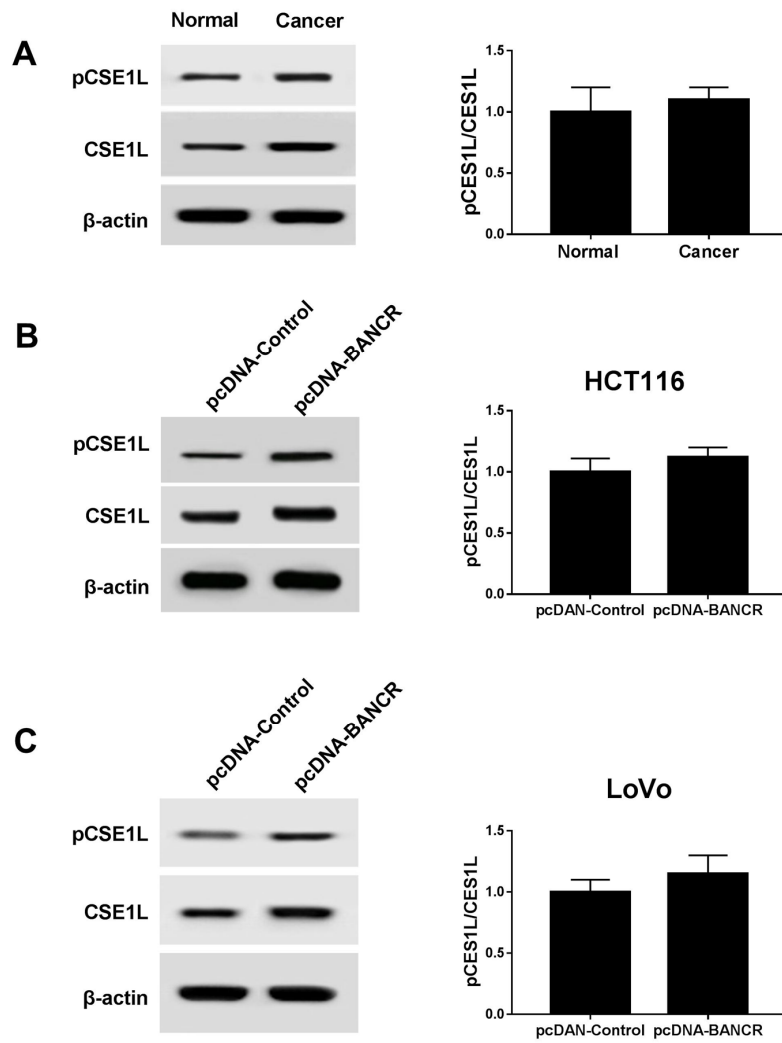

**Figure S1. Phosphorylated CSE1L in CRC tissues and cells.** (A) The ratio of pCSE1L/CSE1L was investigated in CRC tissues and normal control. (B and C) The effect of BANCR on pCSE1L/CSE1L ratio was evaluated in HCT116 and LoVo cells.
